# Supplementary material for: Heterostructure of two different 2D materials based on MoS2nanoflowers@rGO: an electrode material for sodium-ion capacitors
Source: Royal Society of Chemistry journal article supplement (doi:10.1039/c8na00104a), 2018-09-05
Supplement: c8na00104a1.pdf [file c8na00104a1.pdf]

## Heterostructure of two different 2D materials based on MoS<sub>2</sub> nanoflowers@rGO: an electrode material for sodium-ion capacitor

Kiruthiga Ramakrishnan,<sup>a</sup> Chandrasekaran Nithya,<sup>a\*</sup> Ramasamy Karvembu,<sup>b</sup>

<sup>a</sup>Department of Energy and Environment, National Institute of Technology, Tiruchirappalli – 620 015, India,

<sup>b</sup>Department of Chemistry, National Institute of Technology, Tiruchirappalli – 620 015, India.

Corresponding Author:

\*Email: [nithyajcs@gmail.com](mailto:nithyajcs@gmail.com)

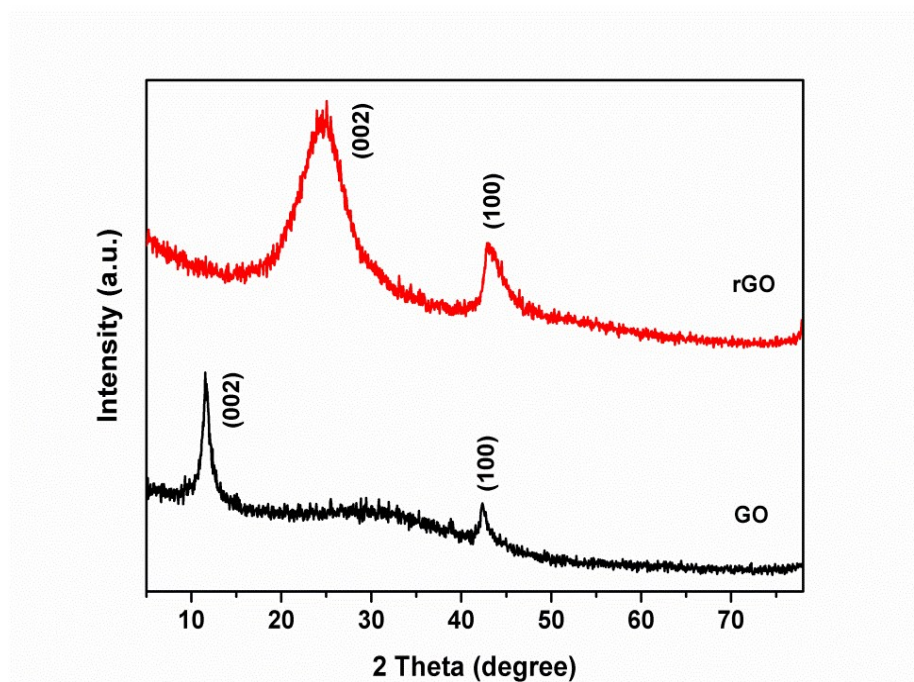

Fig. S1 XRD pattern of GO and rGO

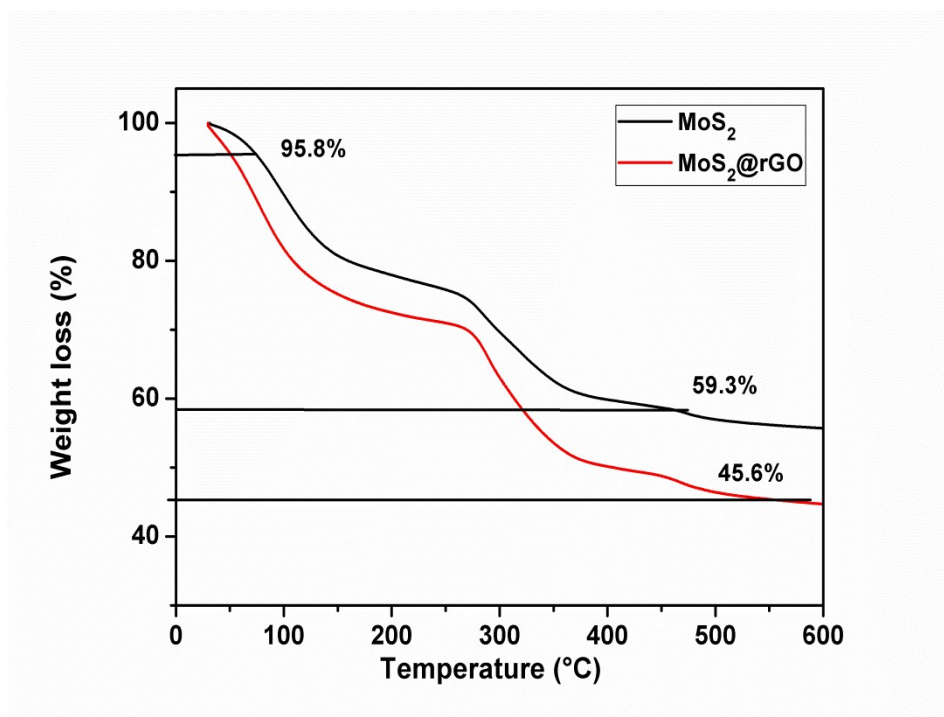

Fig. S2 TG curve of MoS<sub>2</sub> and MoS<sub>2</sub>@rGO composite

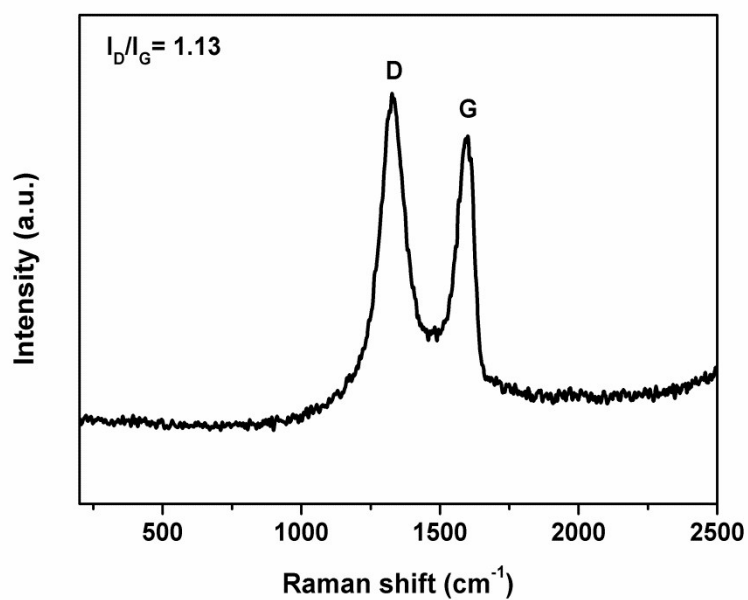

Fig. S3 Raman spectrum of rGO

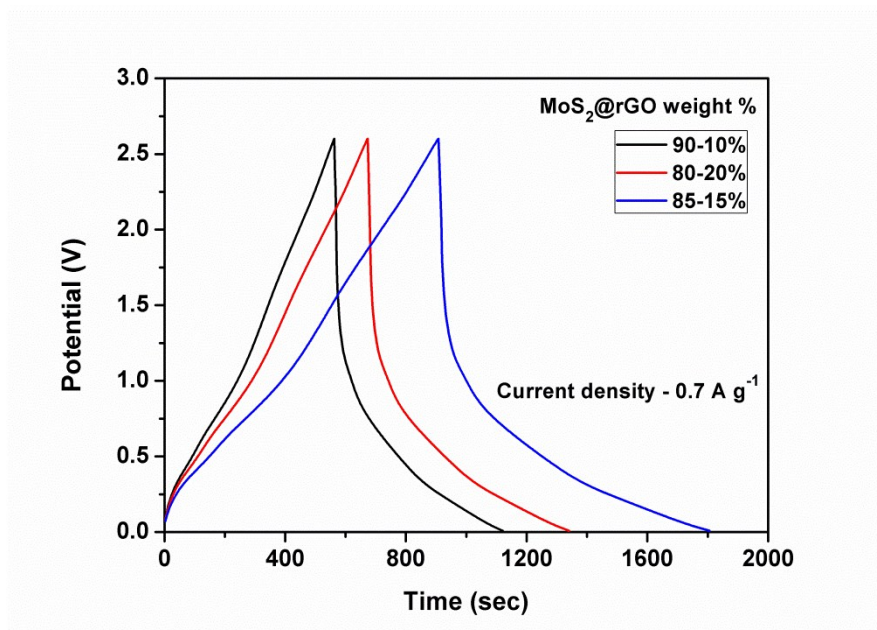

**Fig. S4** Galvanostatic charge-discharge curves of MoS<sub>2</sub>@rGO composites with different weight percentage

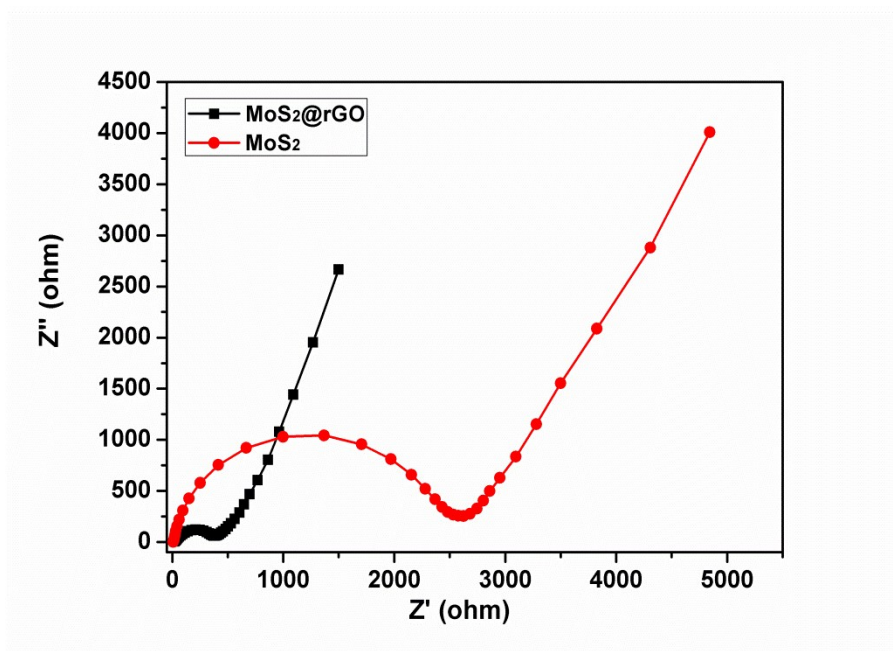

**Fig. S5** Nyquist plot of MoS<sub>2</sub> and MoS<sub>2</sub>@rGO composite

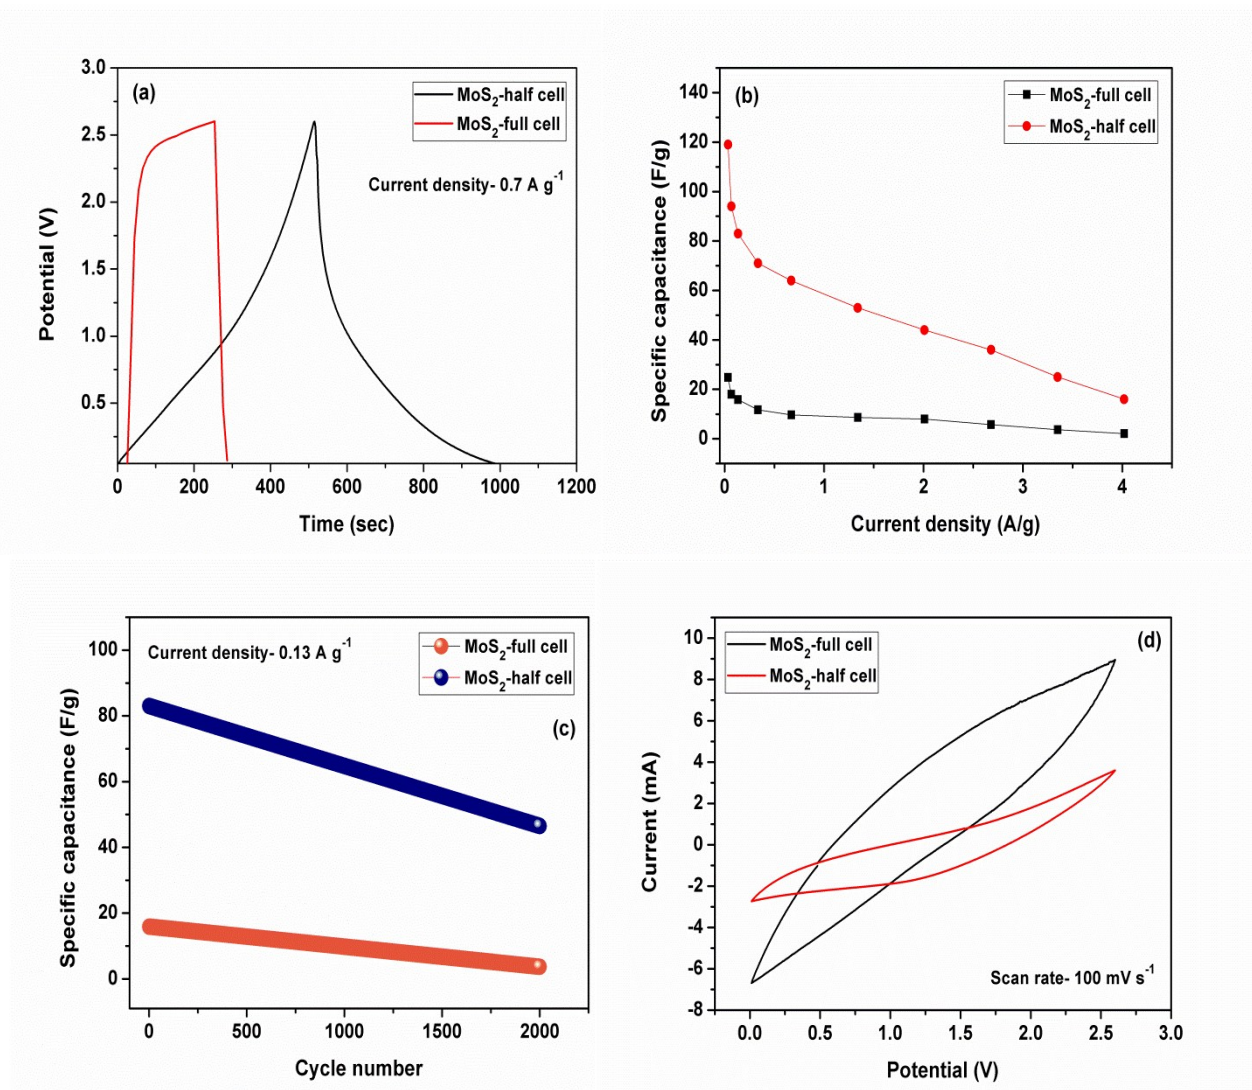

**Fig. S6** Electrochemical performance of pristine MoS<sub>2</sub> vs Na/Na<sup>+</sup> (half cell & full cell). (a) Galvanostatic charge-discharge curves (b) Specific capacitances at different current densities (c) Cycling stability (d) Cyclic voltammograms at different scan rate

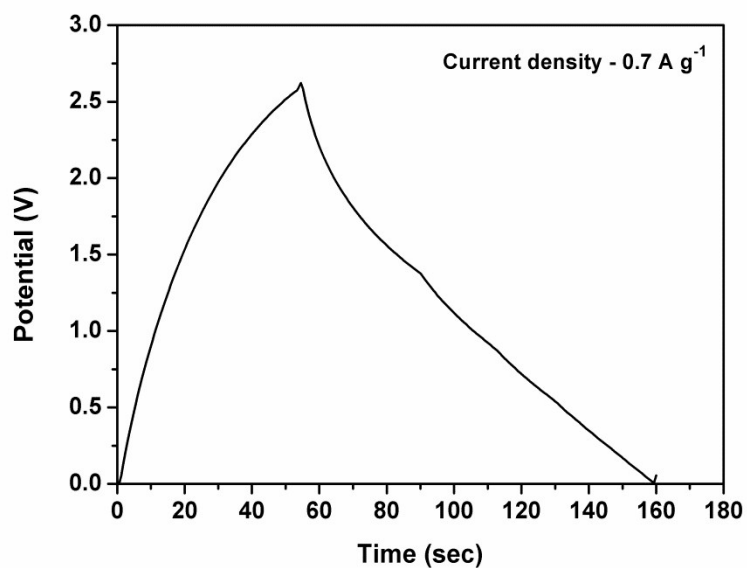

**Fig. S7** Galvanostatic charge-discharge curve of rGO (full cell)

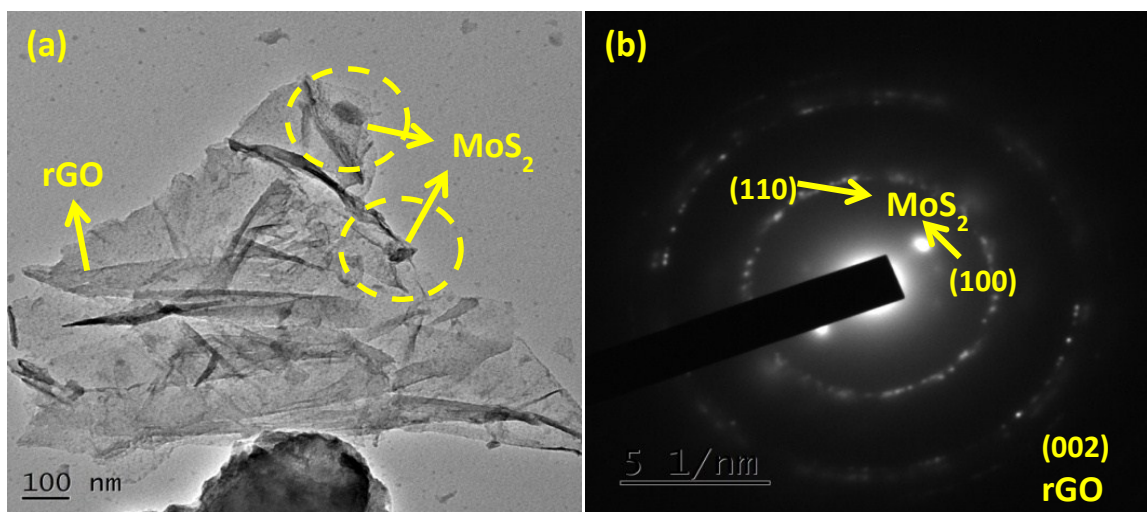

**Fig. S8** (a) HRTEM image and (b) SAED pattern of MoS<sub>2</sub>@rGO composite electrode after 2000 cycles

**Table. S1** Comparison of specific capacitance of MoS<sub>2</sub> based electrode materials for super capacitor application in aqueous and non-aqueous electrolytes

| S.No | Material                                | Method                          | Electrolyte                                    | Scan rate/<br>Current<br>density           | Specific<br>capacitance (Fg <sup>-1</sup> )                 | Reference       |
|------|-----------------------------------------|---------------------------------|------------------------------------------------|--------------------------------------------|-------------------------------------------------------------|-----------------|
| 1.   | MoS <sub>2</sub>                        | CBD                             | 0.5 M Na <sub>2</sub> SO <sub>4</sub>          | 5 mVs <sup>-1</sup>                        | 576                                                         | 37              |
| 2.   | MoS <sub>2</sub>                        | Hydrothermal                    | 1 M Na <sub>2</sub> SO <sub>4</sub><br>1 M KCl | 1 mVs <sup>-1</sup><br>1 mVs <sup>-1</sup> | 376<br>403                                                  | 38              |
| 3.   | MoS <sub>2</sub>                        | Hydrothermal                    | 1 M Na <sub>2</sub> SO <sub>4</sub>            | 5 mVs <sup>-1</sup>                        | 122                                                         | 39              |
| 4.   | MoS <sub>2</sub>                        | CVD                             | 0.5 M H <sub>2</sub> SO <sub>4</sub>           | 1 mVs <sup>-1</sup>                        | 100                                                         | 40              |
| 5.   | MoS <sub>2</sub> /graphene<br>composite | Hydrothermal                    | 1 M NaClO <sub>4</sub><br>(in PC+FEC)          | 1.5 C<br>(C rate)                          | 50<br>(full cell)                                           | 28              |
| 6.   | MoS <sub>2</sub>                        | Solid-gas<br>reaction<br>method | 1 M NaClO <sub>4</sub><br>(in PC)              | 1 mVs <sup>-1</sup>                        | 118 mAhg <sup>-1</sup><br>specific capacity,<br>(half cell) | 27              |
| 7.   | MoS <sub>2</sub> @rGO<br>composite      | Hydrothermal                    | 0.75 M NaPF <sub>6</sub><br>(in EC+DEC)        | 0.03 Ag <sup>-1</sup>                      | 226, (half cell)<br>55 (full cell)                          | Present<br>work |
